# Supplementary material
Source: MDPI journal article supplement (https://www.mdpi.com/2304-6740/2/3/377)
Supplement: s1 [file s1]

## Supplementary Information

**Figure S1.** TEM image of IF-WS<sub>2</sub> nanoparticles (left) along EDS spectra (right) showing that in some locations WO<sub>3</sub> can be identified.

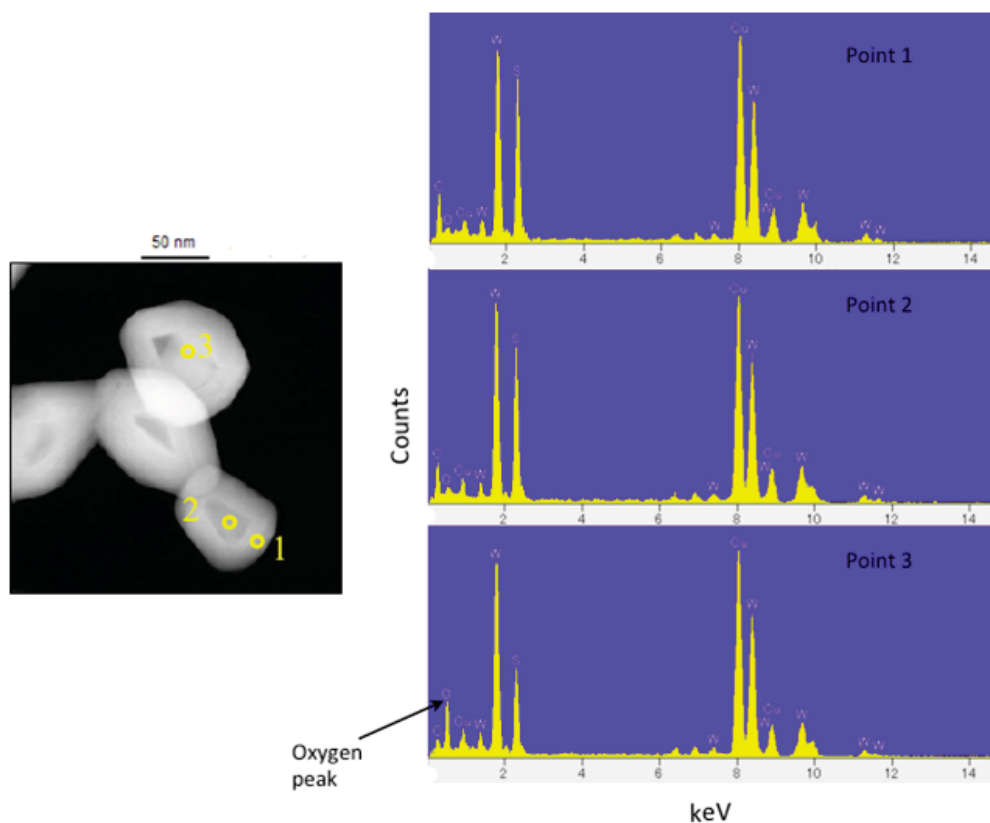

© 2014 by the authors; licensee MDPI, Basel, Switzerland. This article is an open access article distributed under the terms and conditions of the Creative Commons Attribution license (<http://creativecommons.org/licenses/by/3.0/>).
